# Supplementary material for: Vaccination and hybrid immunity is associated with SARS-CoV-2 protection but not shedding duration in rural Guatemalan households
Source: Research Square preprint supplement (doi:10.21203/rs.3.rs-9348647/v1), 2026-05-21
Supplement: Supplementary file 1 [file 6b13b531b7f1eee8fa0bbb38.docx]

**Supplemental Table 1: Comparison of demographics between short shedders (<=7 days) vs long shedders (7-29 days)**

| **Demographic Variable** | **All cases** | **Short shedder*** | **Long shedder*** | **p-value (short vs long)** |
| --- | --- | --- | --- | --- |
|  | N = 82 | N = 45 | N = 37 |  |
| **Age in years** | 23.9 (16.2) | 22.2 (15.0) | 26.0 (17.5%) | 0.28 |
| **Sex = male** | 33 (40.2%) | 17 (37.8%) | 16 (43.2%) | 0.62 |
| **Status**  **Index or Co-index**  **Secondary**  **Tertiary** | 37 (45.1%)  41 (50.0%)  4 (4.9%) | 18 (40.0%)  25 (55.6%)  2 (4.4%) | 19 (51.4%)  16 (43.2%)  2 (5.4%) | 0.54 |
| **Had a pre-existing medical condition** | 14 (14.6%) | 6 (13.3%) | 6 (16.2%) | 0.71 |
| Vaccinated prior to infection | 38 (46.3%) | 19 (42.2%) | 19 (51.4%) | 0.41 |
| Number of vaccines at infection (date start shedding):  0  1  2  3  4 | 44 (53.7%)  8 (9.8%)  20 (24.4%)  9 (11.0%)  1 (1.2%) | 26 (57.8%)  3 (6.7%)  10 (22.2%)  5 (11.1%)  1 (2.2%) | 18 (48.7%)  5 (13.5%)  10 (27.0%)  4 (10.8%)  0 (0%) | 0.68 |
| **Considered up to date at time of infection (date start shedding)** | 28 (34.2%) | 15 (33.3%) | 13 (35.1%) | 0.86 |
| **Hybrid Immunity status at sample collection date****  **Unvaccinated/No prior infection**  **Vaccinated/No prior infection**  **Unvaccinated/Prior Infection**  **Vaccinated/Prior infection (hybrid)** | 11 (13.4%)  7 (8.5%)  46 (56.1%)  18 (22.0%) | 8 (17.8%)  3 (6.7%)  25 (55.6%)  9 (20.0%) | 3 (8.1%)  4 (10.8%)  21 (56.8%)  9 (24.3%) | 0.57 |

**Supplemental Table 2: Comparison of demographics between SARS-CoV-2 cases and matched uninfected non-cases (controls), excluding cases (n=29) that had a vaccine dose between sample collection and COVID-19 illness.**

| **Demographic Variable** | **All subjects** | **SARS-CoV-2 Cases** | **Controls** | **p-value**  **(cases vs controls)** |
| --- | --- | --- | --- | --- |
|  | N = 191 | N = 90 | N = 101 |  |
| **Age in years** | 21.7 (16.3) | 19.8 (14.8) | 23.3 (17.5) | 0.11 |
| **Sex = male** | 88 (46.1%) | 36 (40.0%) | 52 (51.5%) | 0.11 |
| **Status**  **Index or Co-index**  **Secondary**  **Tertiary**  **Not a case** | 40 (20.9%)  44 (23.0%)  6 (3.1%)  101 (52.9%) | 40 (44.4%)  44 (48.9%)  6 (6.7%)  0 (0%) | 0 (0%)  0 (0%)  0 (0%)  101 (100%) | N/A |
| **Pre-existing medical condition** | 26 (13.6%) | 10 (11.1%) | 16 (15.8%) | 0.34 |
| **# vaccine doses at time of enrollment (sample collection date):***  **0**  **1**  **2**  **3** | 125 (65.5%)  15 (7.9%)  35 (18.3%)  16 (8.4%) | 64 (71.1%)  6 (6.7%)  17 (18.9%)  3 (3.33%) | 61 (60.4%)  9 (8.9%)  18 (17.8%)  13 (12.9%) | 0.096 |
| **Received a vaccine dose during the past 12 months (counted back from sample collection) (if completed primary series)** | 51 (26.7%) | 20 (22.2%) | 31 (30.7%) | 0.19 |
| **Hybrid Immunity status at sample collection date****  **Unvaccinated/No prior infection**  **Vaccinated/No prior infection**  **Unvaccinated/Prior Infection**  **Vaccinated/Prior infection (hybrid)** | 35 (18.4%)  12 (6.3%)  95 (50.0%)  48 (25.3%) | 17 (18.9%)  8 (8.9%)  50 (55.6%)  15 (16.7%) | 18 (18.0%)  4 (4.0%)  45 (45.0%)  33 (33.0%) | 0.049 |

*Cases were enrolled at the time of first confirmed SARS-CoV-2 infection; for controls, we used the same date as their matched cases. Six controls, which were matched based on the date of serum collection, were excluded because they had ended study participation by the time their matched cases developed SARS-CoV-2 infection. **Prior infection was inferred from nucleocapsid IgG positivity and hybrid immunity was defined based on having both documented vaccination and prior infection. Note that one vaccinated control had no nucleocapsid IgG data due to sample availability.

**Supplemental Table 3: Comparison of SARS-CoV-2 IC50 values preceding SARS-CoV-2 infection (cases) and in matched non-infected controls, excluding cases (n=29) that had a vaccine dose between sample collection and COVID-19 illness.**

| **Demographic Variable** | **SARS-CoV-2 Cases** | **Controls** | **p-value** |
| --- | --- | --- | --- |
|  | N = 90 | N = 101 |  |
|  | Median (IQR) | Median (IQR) |  |
| **Overall** | 28.8 (2.0, 186.9) | 50.4 (12.5, 215.9) | 0.16 |
| **Sex = male** | 22.4 (10.6, 119.9) | 43.7 (10.3, 215.9) | 0.16 |
| **# vaccine doses at enrollment (sample collection date:***  **0**  **1**  **2**  **3** | 32.6 (9.1, 209.9)  36.6 (2.0, 74.0)  47.1 (2.0, 108.5)  13.1 (2.0, 19.0) | 24.5 (2.0, 68.4)  182.7 (45.2, 245.3)  87.0 (31.3, 325.5)  232.5 (179.6, 507.0) | 0.26  0.07 0.10  0.01 |
| **Considered “up-to-date” at the time of enrollment (sample collection date)** | 16.1 (2.0, 83.5) | 155.6 (79.2, 447.8) | 0.001 |
| **Hybrid Immunity status at sample collection date****  **Unvaccinated/No prior infection**  **Vaccinated/No prior infection**  **Unvaccinated/Prior Infection**  **Vaccinated/Prior infection (hybrid)** | 2.0 (2.0, 74.0)  3.1 (2.0, 29.2)  49.0 (13.3, 340.8)  51.1 (2.0, 125.6) | 2.0 (2.0, 14.2)  78.8 (2.0, 185.75)  41.8 (14.6, 153.7)  184.0 (87.4, 491.7) | 0.65  0.53  0.47  0.003 |

*Vaccinated prior to the time of serum sample collection. **includes only 4 cases and 13 controls

**Supplemental Figure 1**

**
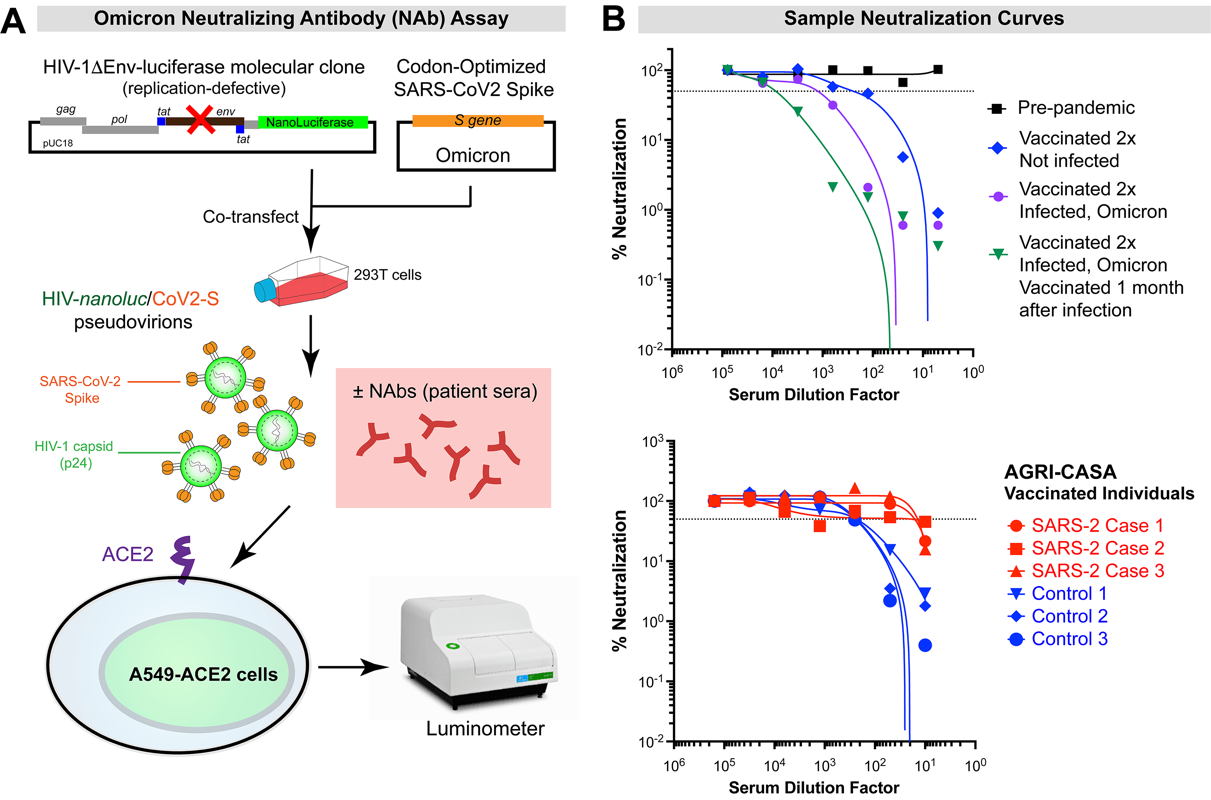
**

**Supplemental Figure 1.** Lentivirus-based Neutralizing Antibody (NAb) Assay. To measure Omicron-specific NAb in serum samples, HIV-1 Env-defective/nanoluciferase constructs were pseudotyped with the Omicron (BA.1) Spike gene. Pseudotype entry was assessed in A549-ACE2 cells. Typical neutralization curves were shown for (B) control and representative AGRI-CASA serum samples. Dotted lines mark the serum concentration that results in 50% inhibition relative to mock.

**Supplemental Figure 2**

**
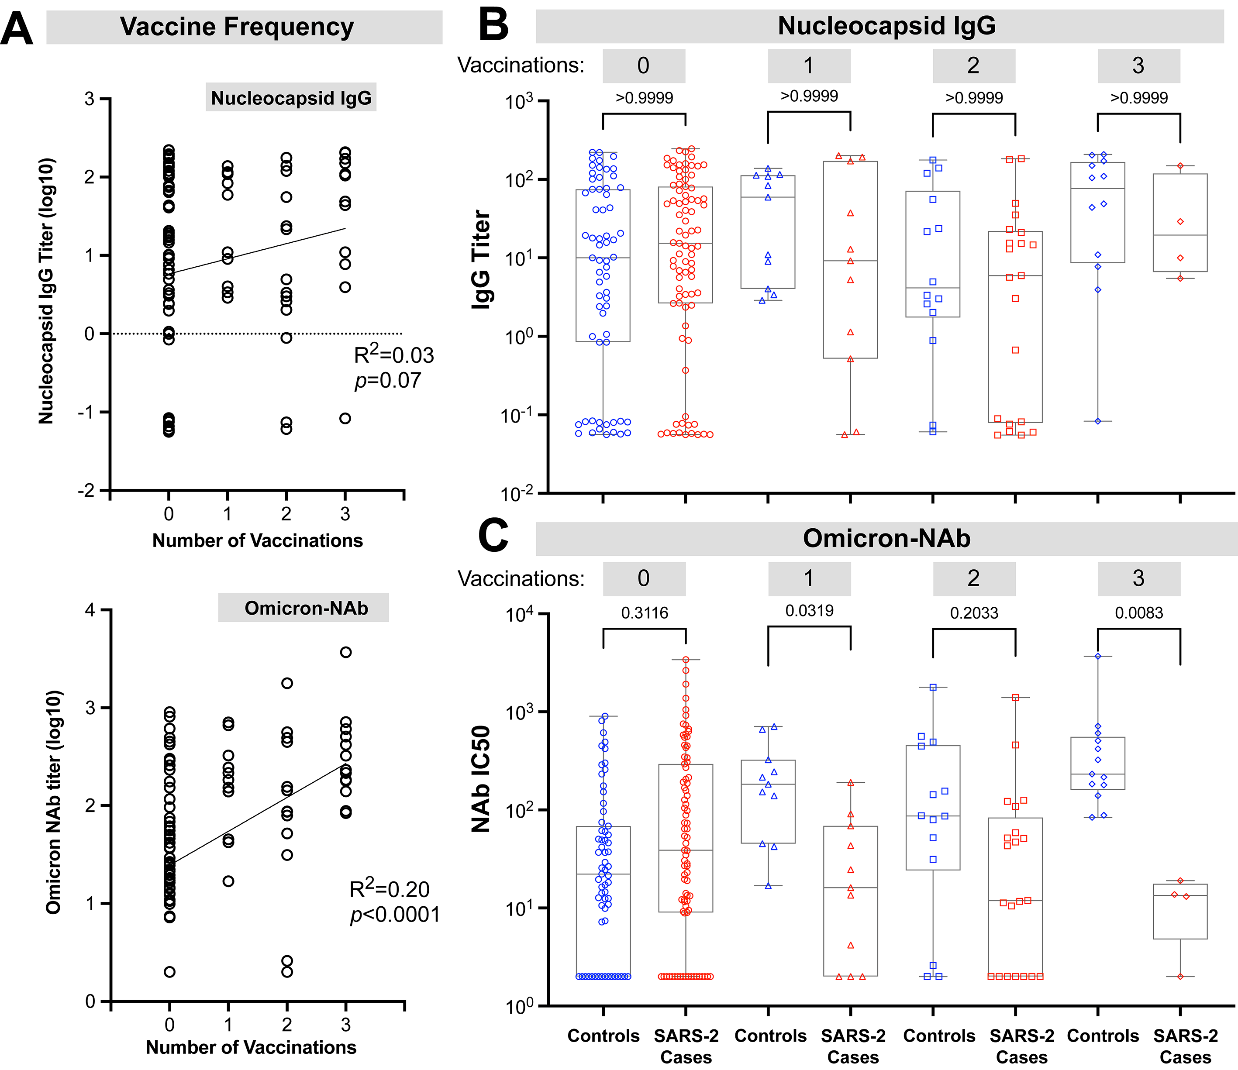
**

**Supplemental Figure 2.** Vaccination frequency and SARS-CoV-2 antibody Titers**. (**A**)** Relationship between the number of vaccinations and log-transformed nucleocapsid IgG (upper) and Omicron NAb (lower) titers. Correlations were assessed by simple linear regression.(B-C) Comparison of Antibody levels in Serum of SARS-CoV-2 cases versus controls based on the number of vaccination doses. Each dot corresponds to samples from a single individual. Bars and lines correspond to median ± IQR. Differences were evaluated using One-Way ANOVA (Kruskall-Wallis test) followed by Dunn’s Multiple Comparisons test, with the p-values shown.
